# Supplementary figures and images for: Growth of human gastric cancer cells in nude mice is delayed by a ketogenic diet supplemented with omega-3 fatty acids and medium-chain triglycerides
Source: Springer Nature journal article supplement (doi:10.1186/1471-2407-8-122), 2008-04-30

# 11

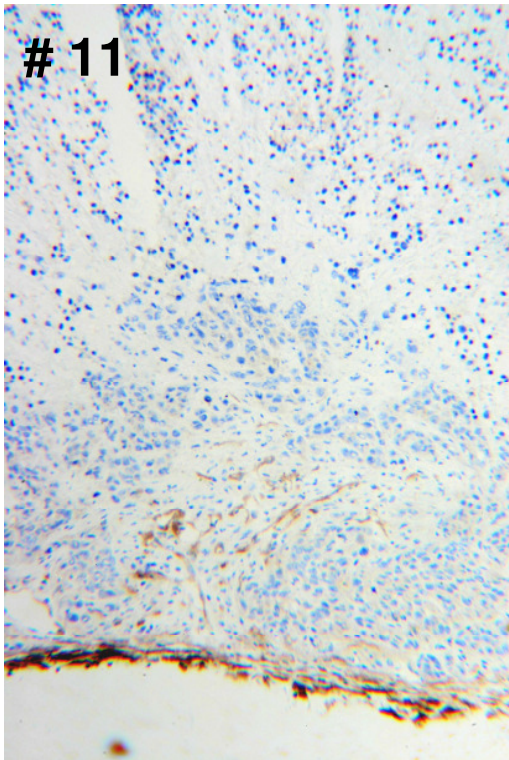

#13

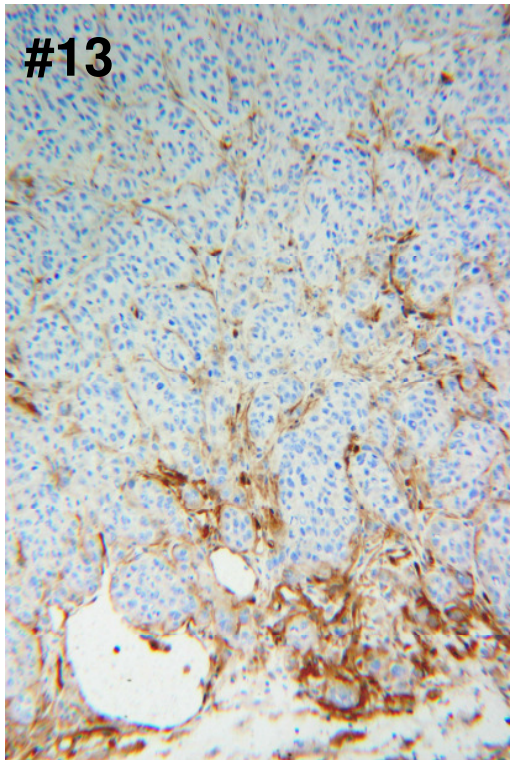

Supplement: Additional file 2 [file 1471-2407-8-122-s2.pdf]
